# Supplementary material for: Thienyl-substituted methanofullerene derivatives for organic photovoltaic cells
Source: Royal Society of Chemistry journal article supplement (doi:10.1039/b916597e), 2009-11-14
Supplement: b916597e.pdf [file b916597e.pdf]

**Electronic Supplementary Information for:**  
**Thienyl-Substituted Methanofullerene Derivatives for Organic Photovoltaic  
Cells**

Jung Hei Choi,<sup>a</sup> Kyung-In Son,<sup>b</sup> Taehee Kim,<sup>b</sup> Kyungkon Kim,<sup>\*b</sup> Kei Ohkubo,<sup>a</sup> and  
Shunichi Fukuzumi<sup>\*a</sup>

*<sup>a</sup>Department of Material and Life Science, Graduate School of Engineering, Osaka University,  
Suita, SORST, Japan Science Technology Agency, Osaka 565-0871, Japan.*

*E-mail: fukuzumi@chem.eng.osaka-u.ac.jp*

*<sup>b</sup>Solar cell Research Center, Korea Institute of Science and Technology, P.O. Box 131,*

*Cheongryang, Seoul 130-650, Republic of Korea. E-mail: kimkk@kist.re.kr*

*kimkk@kist.re.kr*

## MALDI-TOF mass spectra

### (a) the monoadduct 1

Data: H4a20001.H4 25 Jul 2008 1:29 Cal: InsulinB\_CHCA 21 Jun 2007 11:27  
Kratos PC Axima CFR V2.3.5: Mode Linear\_neg, Power: 77, P.Ext. @ 916 (bin 52)  
%Int. 1795 mV[sum= 53842 mV] Profiles 1-30 Smooth Gauss 1 -Baseline 20

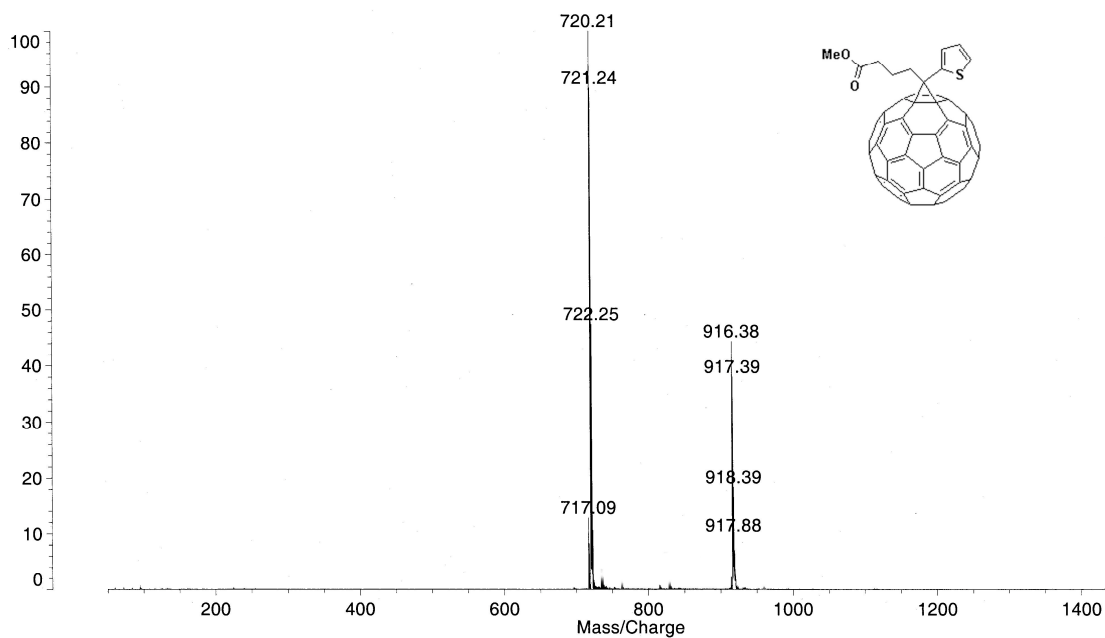

### (b) the bisadduct 2

Data: Column20001.A2 30 Apr 2009 20:56 Cal: InsulinB\_CHCA 21 Jun 2007 13:05  
Kratos PC Axima CFR V2.3.5: Mode Reflectron\_neg, Power: 39, P.Ext. @ 2500 (bin 128)

%Int. 196 mV[sum= 5887 mV] Profiles 1-30 Smooth Gauss 1 -Baseline 20

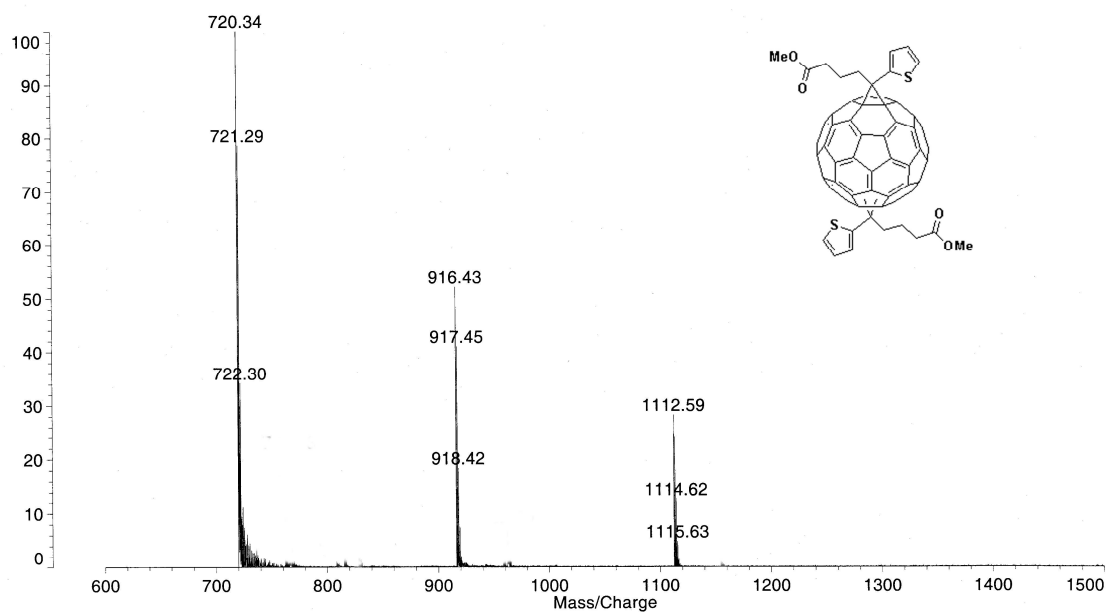

### (c) the trisadduct 3

Data: <Untitled>.B1 1 May 2009 17:26 Cal: InsulinB\_CHCA 21 Jun 2007 11:27  
Kratos PC Axima CFR V2.3.5: Mode Linear\_neg, Power: 37, P.Ext. @ 670 (bin 47)

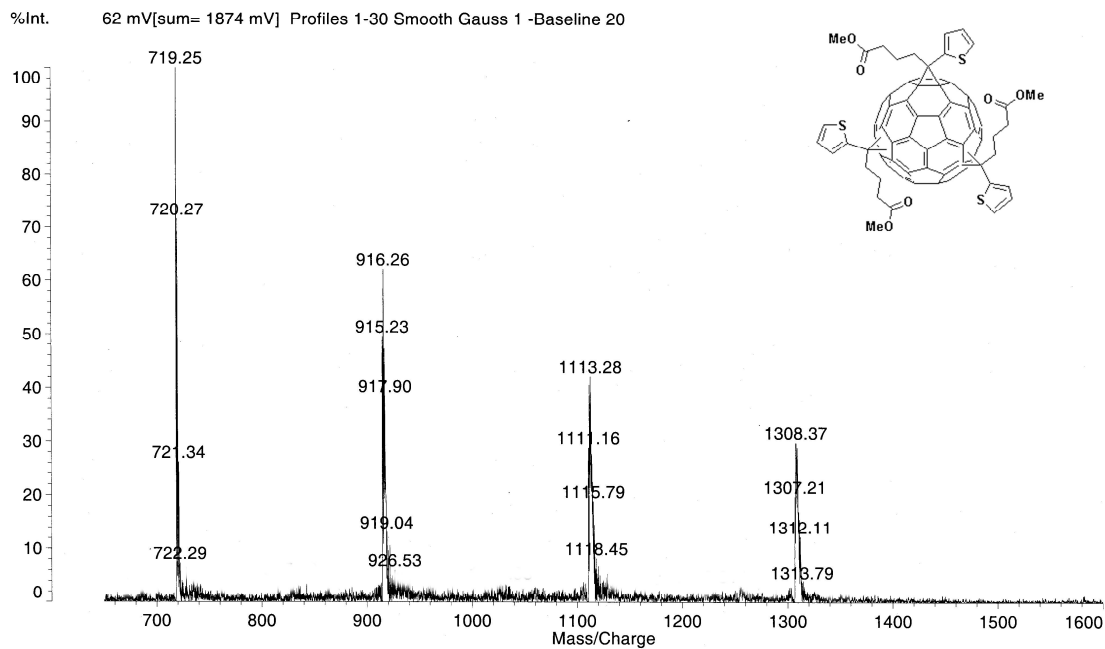

### (d) the tetrakisadduct 4

Data: Tetra0002.B4 12 May 2009 17:48 Cal: InsulinB\_CHCA 21 Jun 2007 11:27  
Kratos PC Axima CFR V2.3.5: Mode Linear\_neg, Power: 80, P.Ext. @ 760 (bin 47)

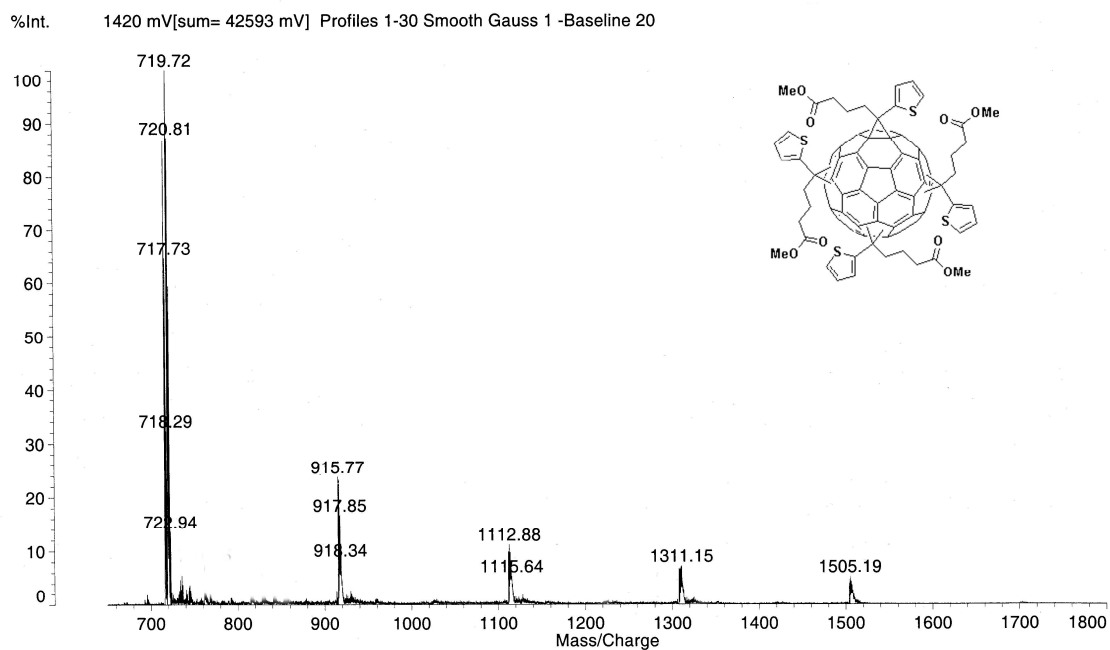

(e) the monoadduct with dimethoxy group 5

Data: <Untitled>.C5 11 May 2009 14:37 Cal: InsulinB\_CHCA 21 Jun 2007 11:27  
Kratos PC Axima CFR V2.3.5: Mode Linear\_neg, Power: 80, P.Ext. @ 760 (bin 47)

%Int. 1451 mV[sum= 58035 mV] Profiles 1-40 Smooth Gauss 1 -Baseline 20

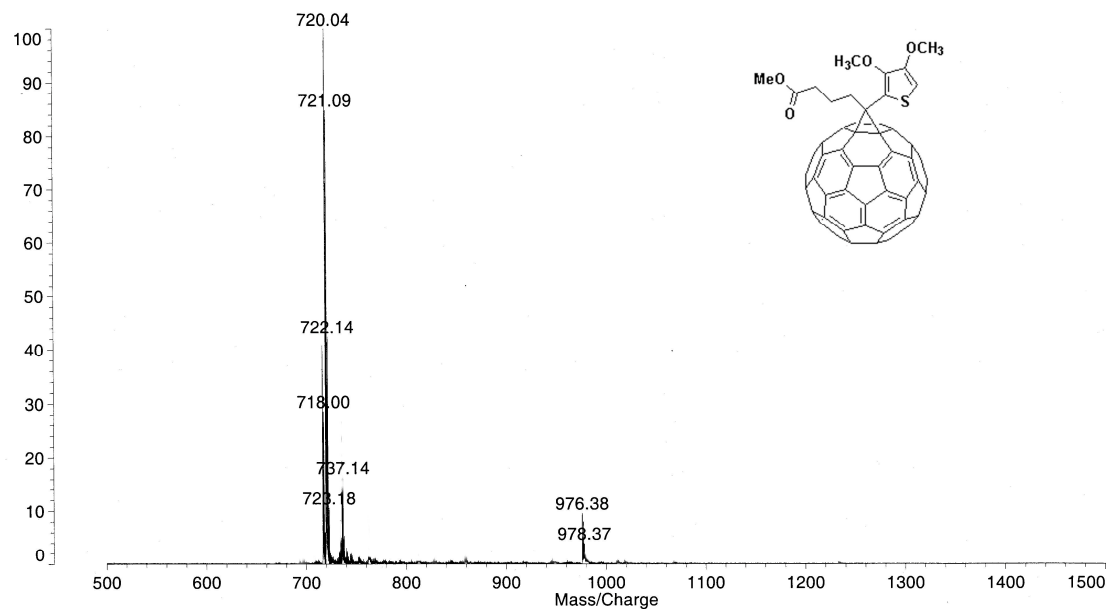

**Figure S1.** MALDI-TOF mass spectra of (a) the monoadduct **1**, (b) the bisadduct **2**, (c) the trisadduct **3**, (d) the tetrakisadduct **4** and (e) the monoadduct with dimethoxy group **5** using dithiranol as the matrix.

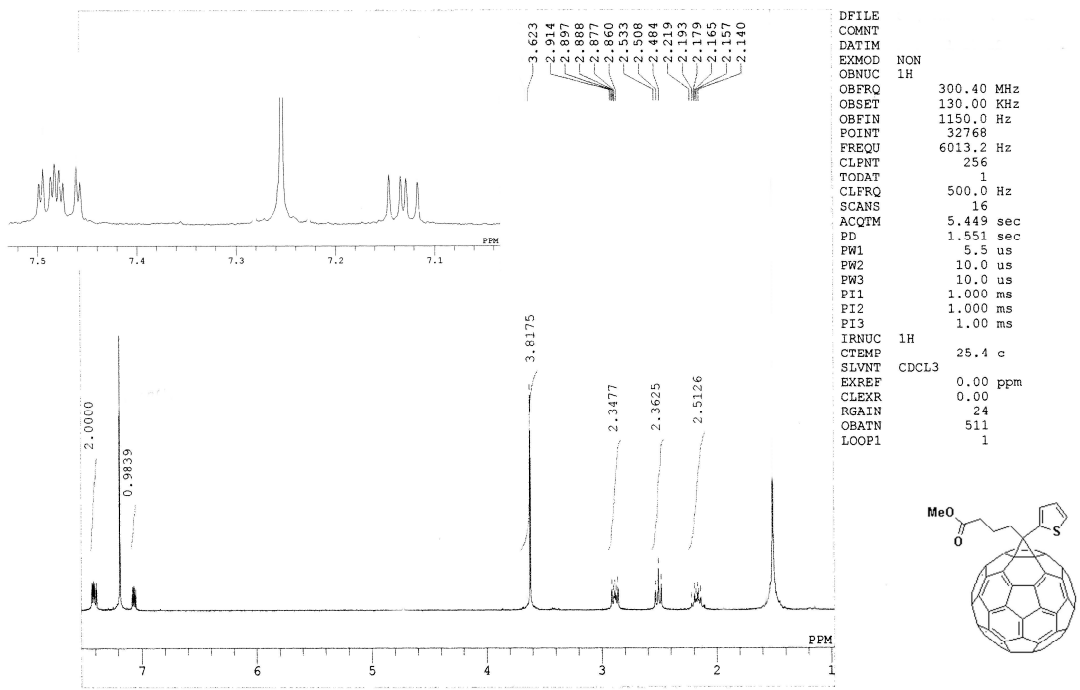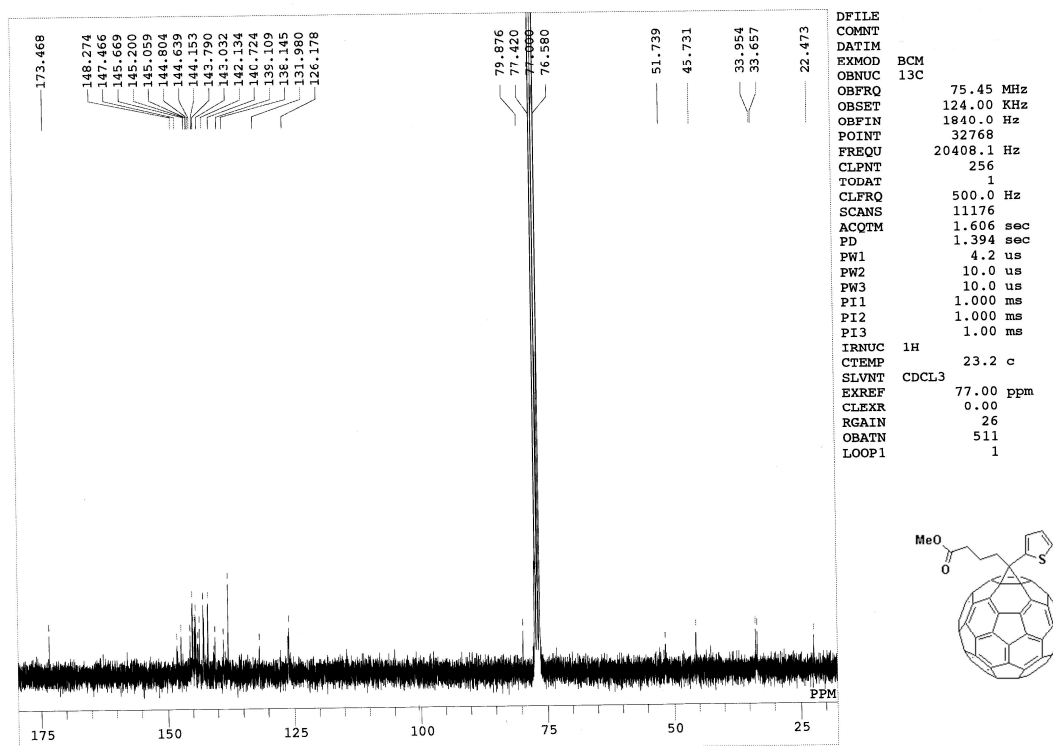

Figure S2. (a)  $^1\text{H}$  NMR and  $^{13}\text{C}$  NMR spectra of compound 1.

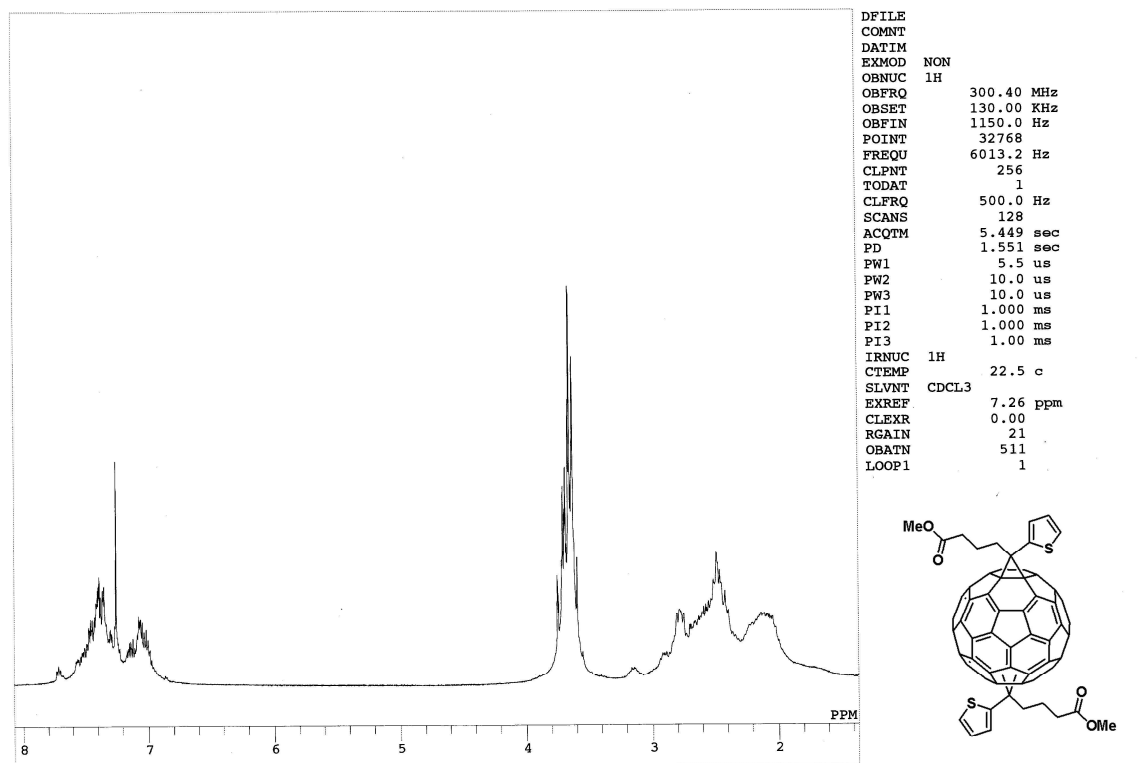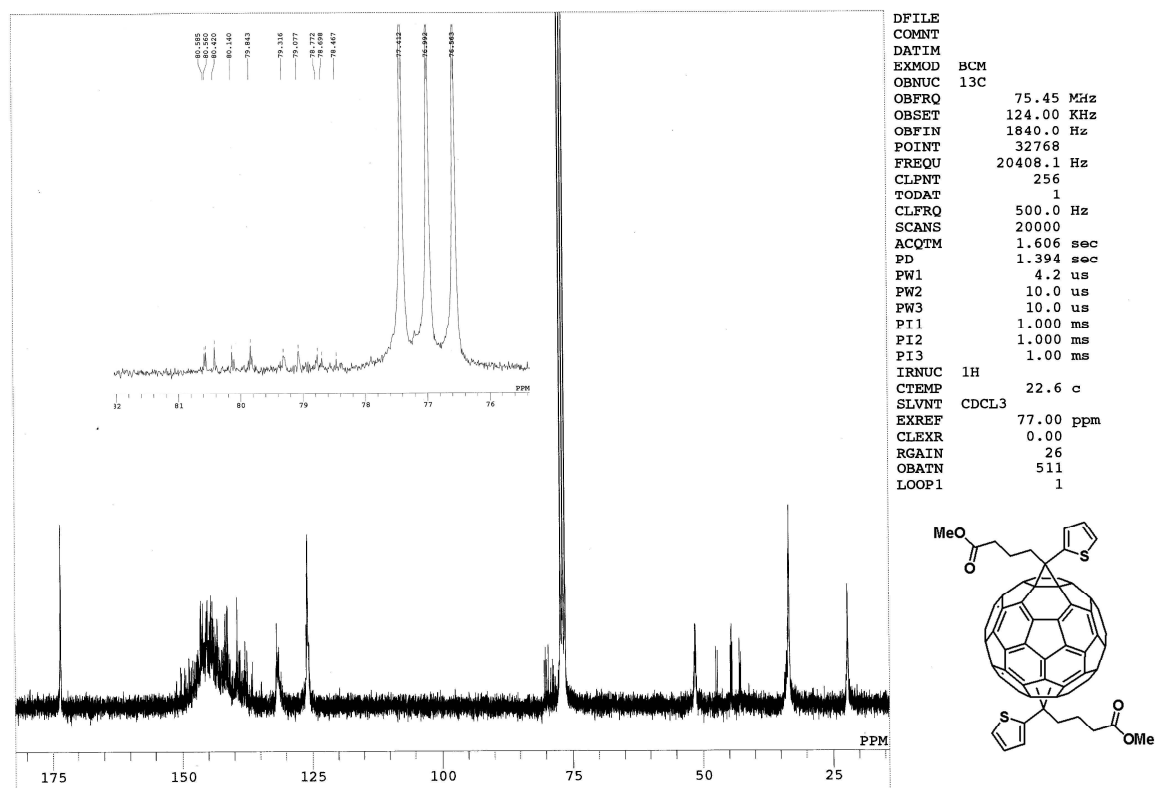

Figure S2. (b)  $^1\text{H}$  NMR and  $^{13}\text{C}$  NMR spectra of compound 2.

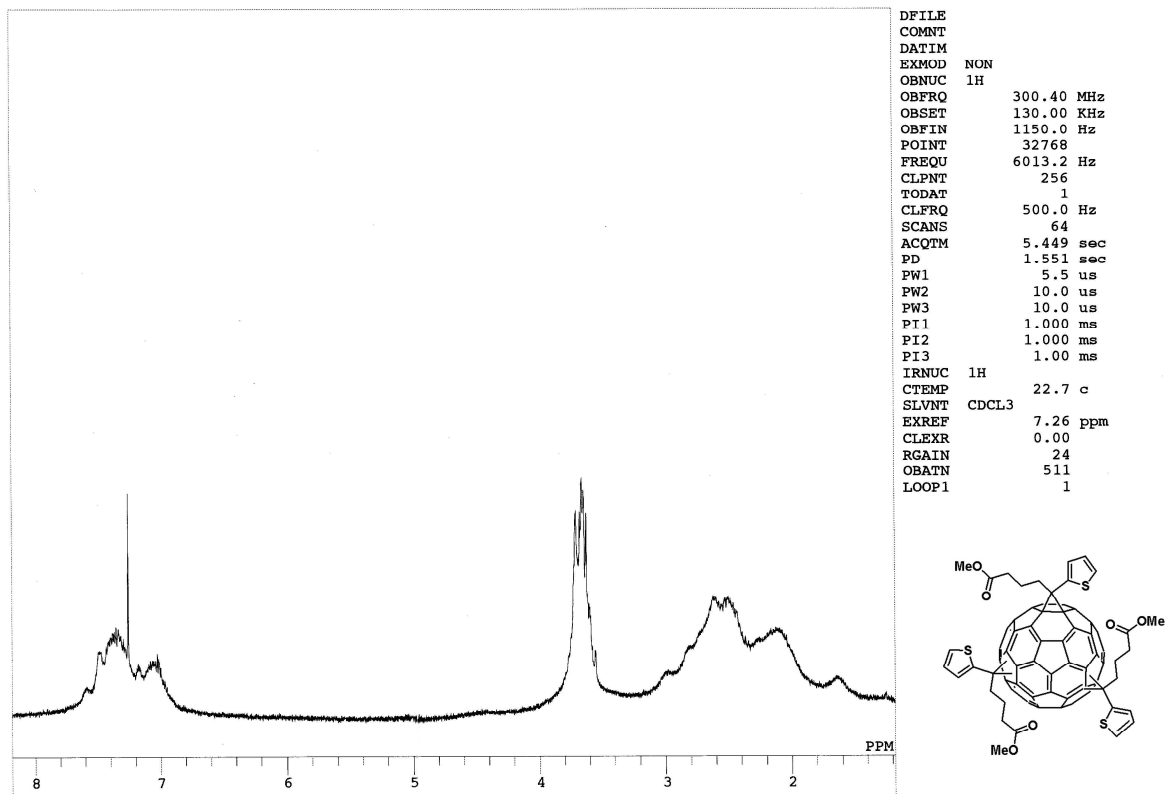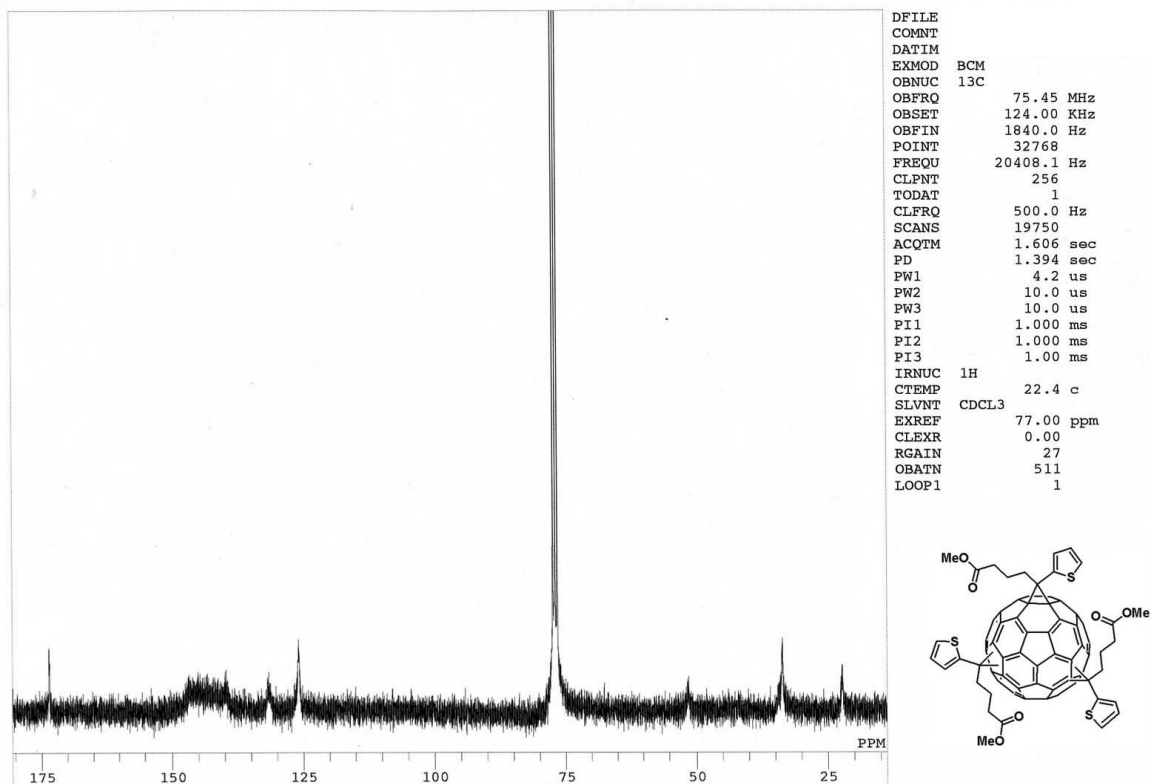

Figure S2. (c)  $^1\text{H}$  NMR and  $^{13}\text{C}$  NMR spectra of compound 3.

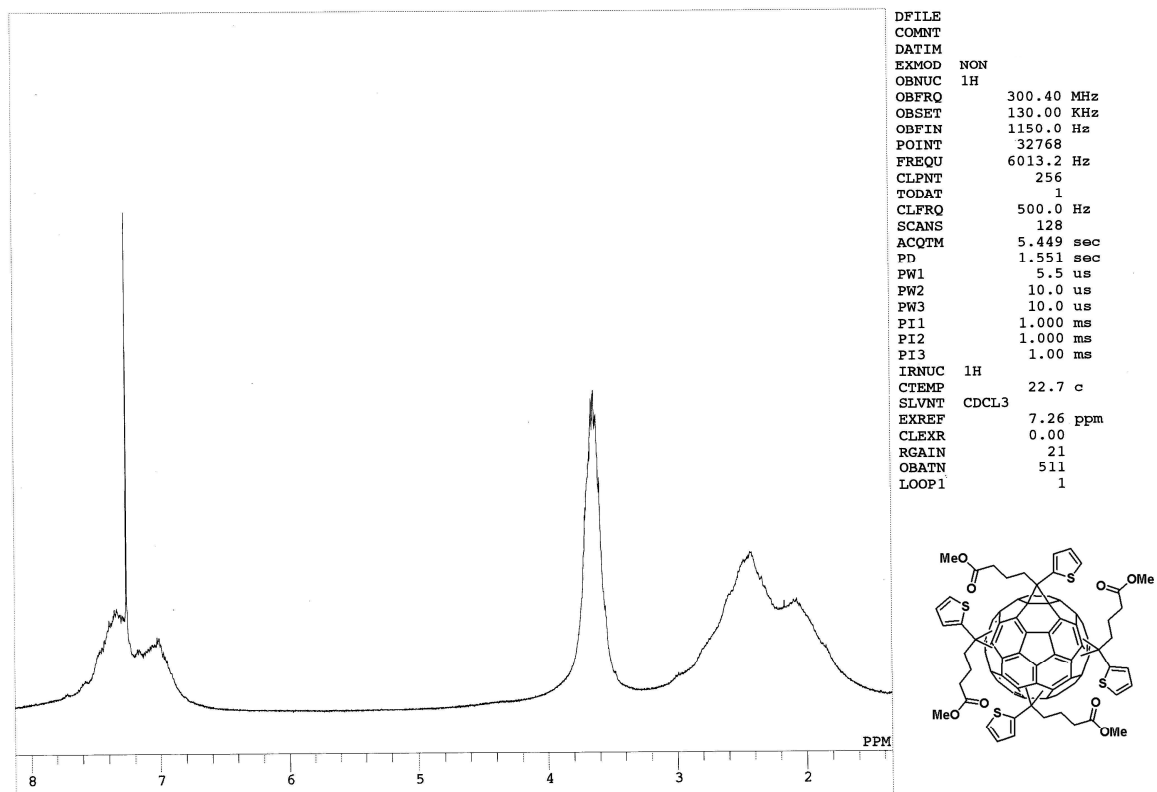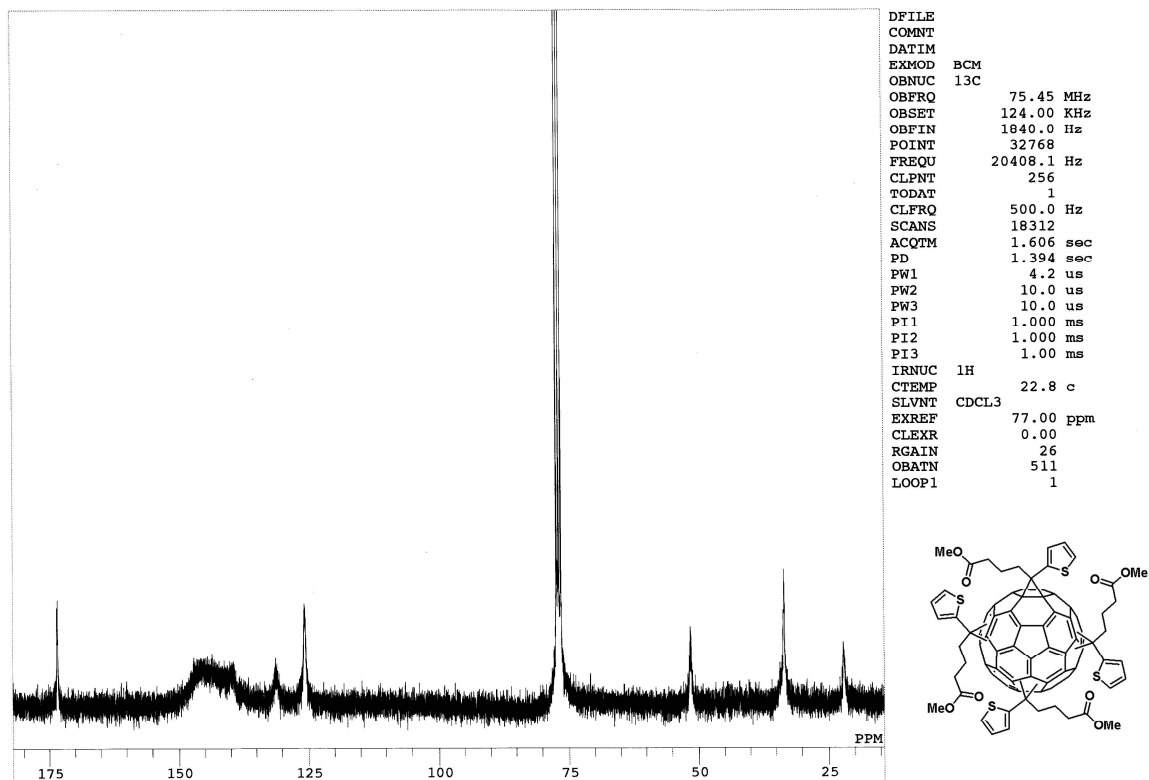

Figure S2. (d)  $^1\text{H}$  NMR and  $^{13}\text{C}$  NMR spectra of compound 4.



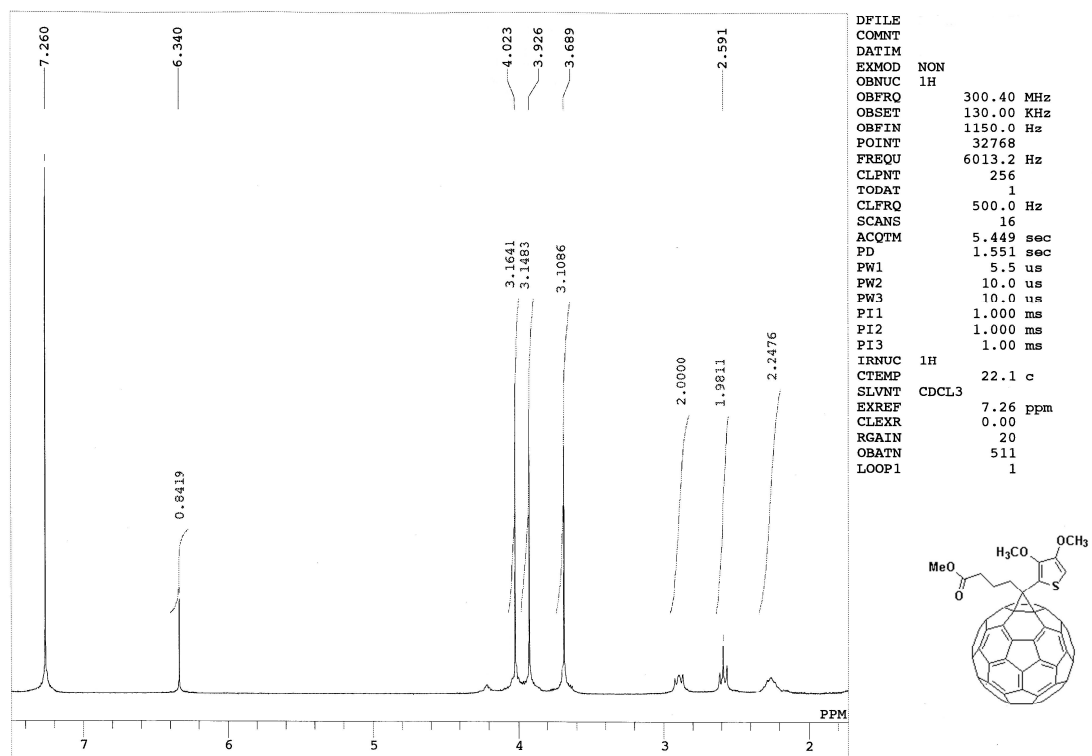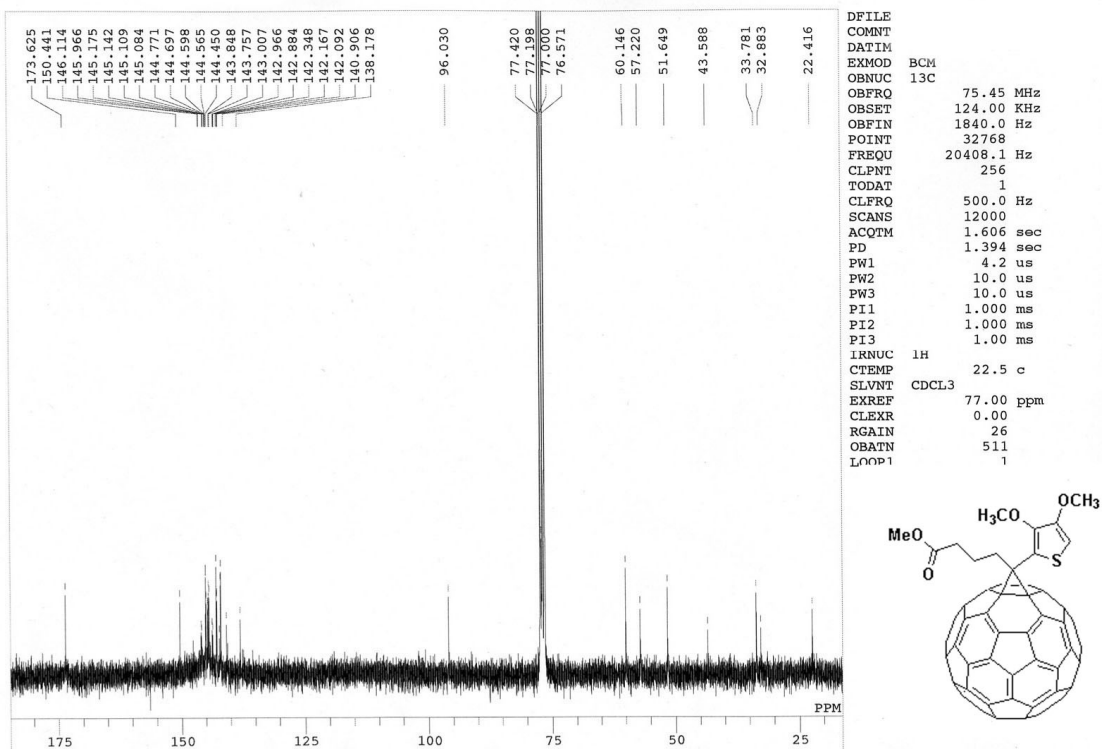

Figure S2. (e)  $^1\text{H}$  NMR and  $^{13}\text{C}$  NMR spectra of compound 5.

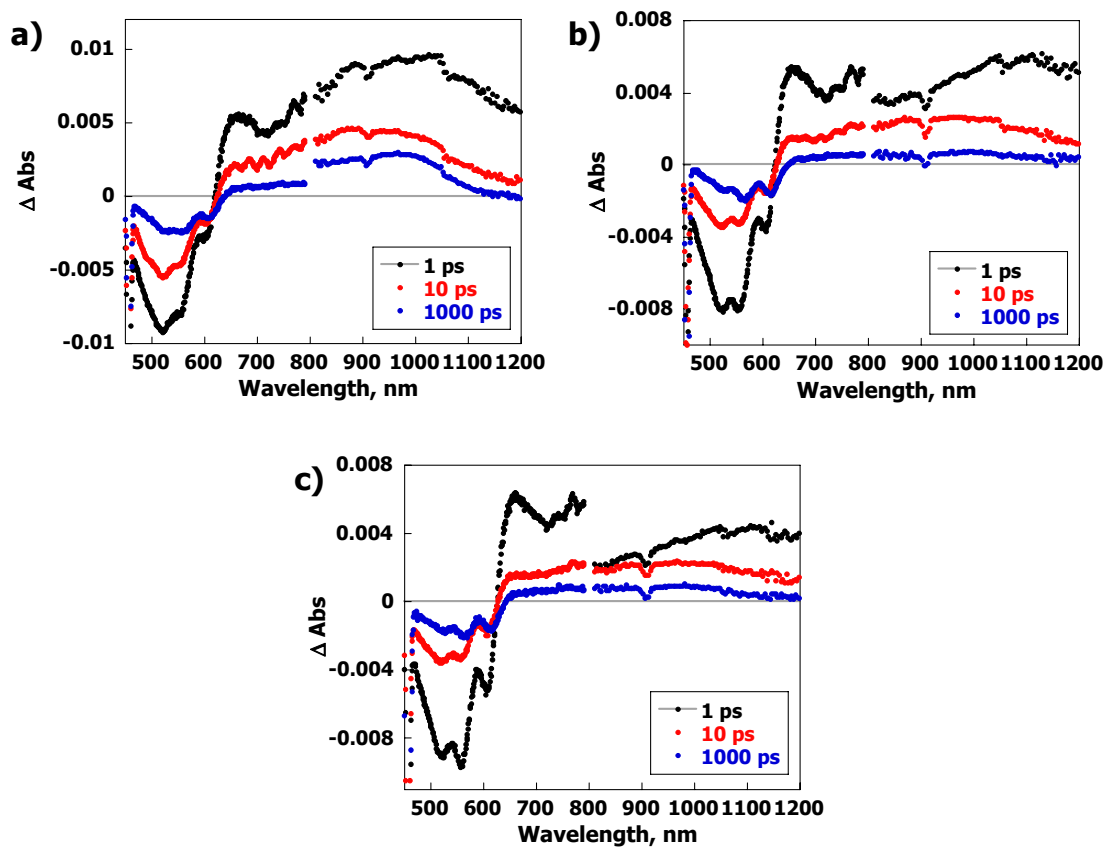

**Figure S3.** Transient absorption spectra of (a) P3HT:PCBM film, (b) P3HT:2 film and (c) P3HT:5 film obtained by femtosecond laser flash photolysis taken at 1 and 1000 ps after laser excitation (450 nm) at 298K.

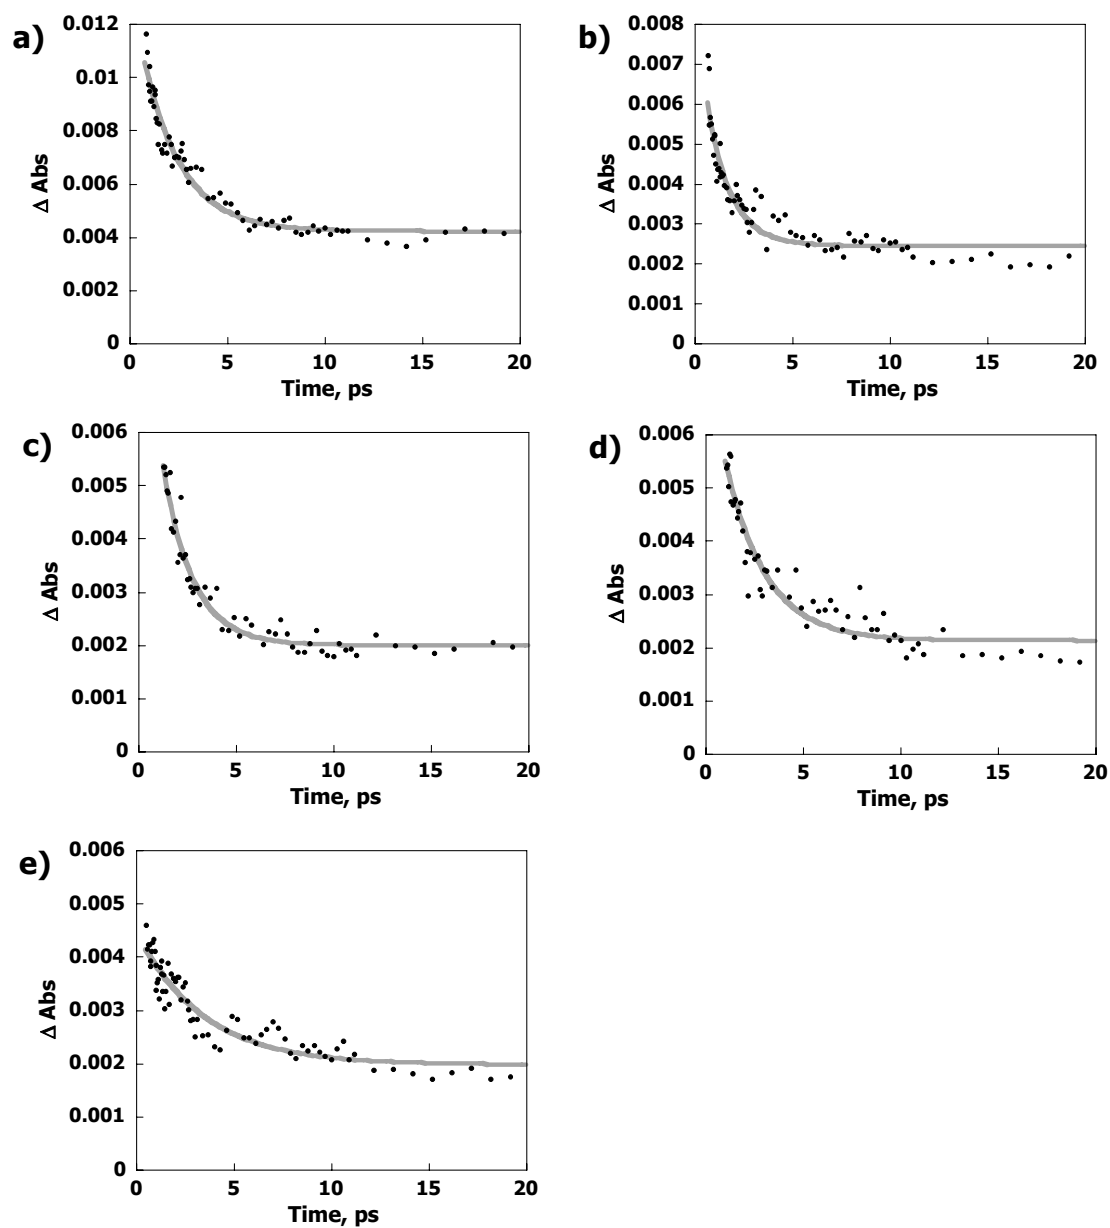

**Figure S4.** Time profiles of absorbance (a) P3HT:PCBM film, (b) P3HT:2 film, (c) P3HT:3 film, (d) P3HT:4 film and (e) P3HT:5 film of at 1000 nm in the 20 ps range.

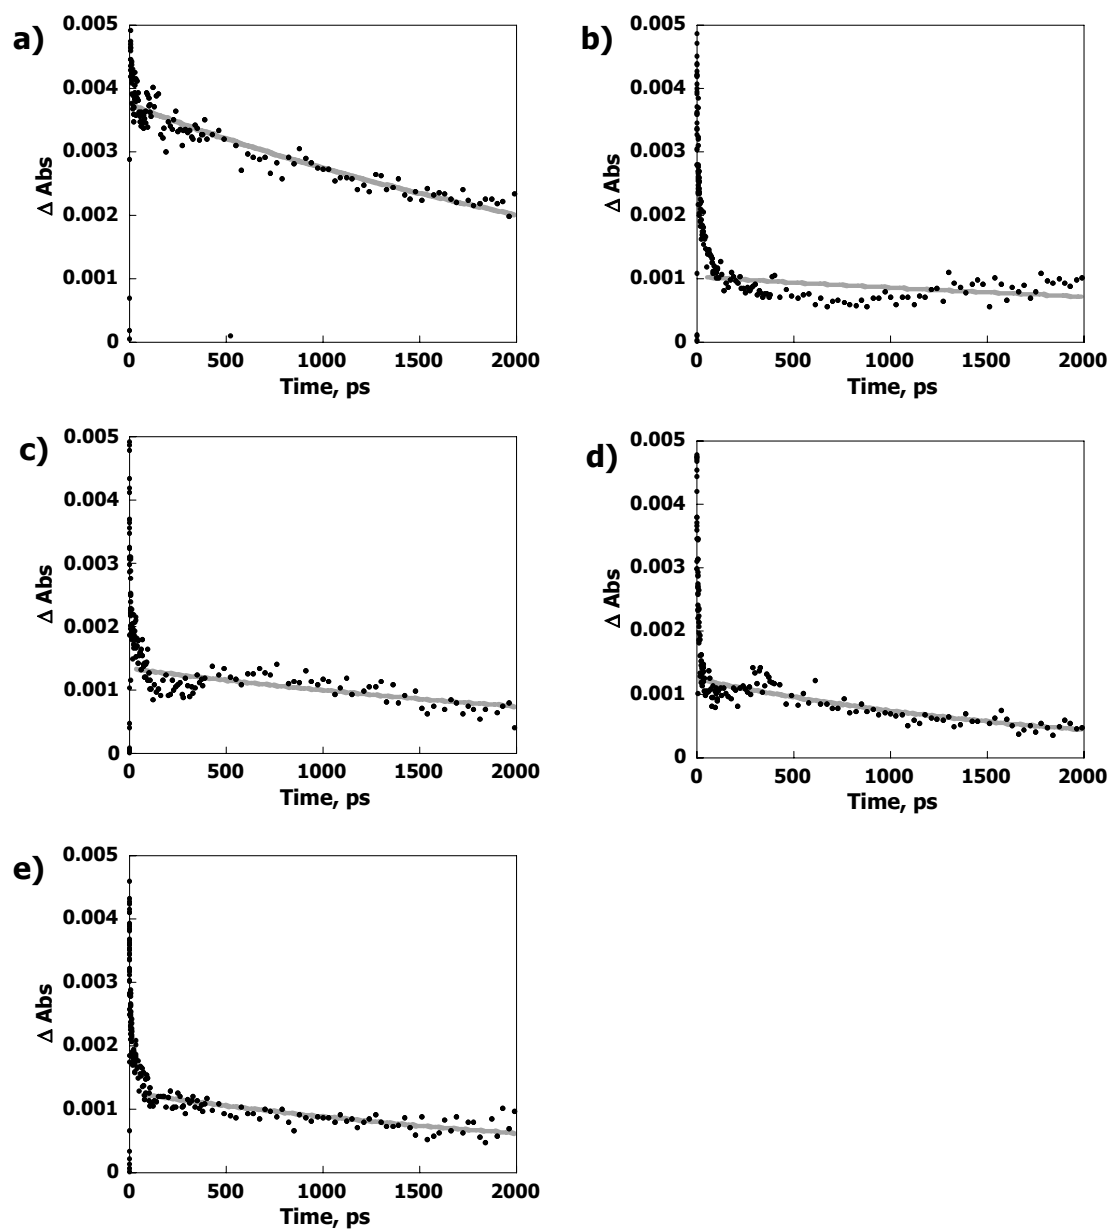

**Figure S5.** Time profiles of absorbance (a) P3HT:PCBM film, (b) P3HT:2 film, (c) P3HT:3 film, (d) P3HT:4 film and (e) P3HT:5 film of at 1000 nm in the 2000 ps range.

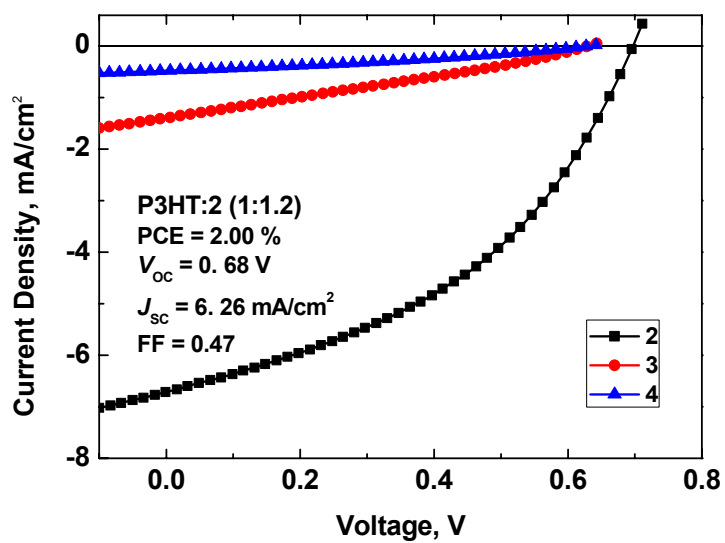

**Figure S6.** Current density-voltage ( $J$ - $V$ ) characteristics of P3HT:2 (1:1.2), P3HT:3 (1:1.4) and P3HT:4 (1:1.6) blend solar cells under AM 1.5 G simulated solar illumination (100 mW/cm<sup>2</sup>).
